# Supplementary material for: Safety, Tolerability, and Pharmacokinetics of the Novel Antiviral Agent Ensitrelvir Fumaric Acid, a SARS-CoV-2 3CL Protease Inhibitor, in Healthy Adults
Source: PubMed Central journal article supplement (PMC9578392; doi:10.1128/aac.00632-22), 2022-09-12
Supplement: aac.00632-22-s0001.pdf [file aac.00632-22-s0001.pdf]

1 **Supplementary Material**

2 **Supplementary Figure S1: Study design**

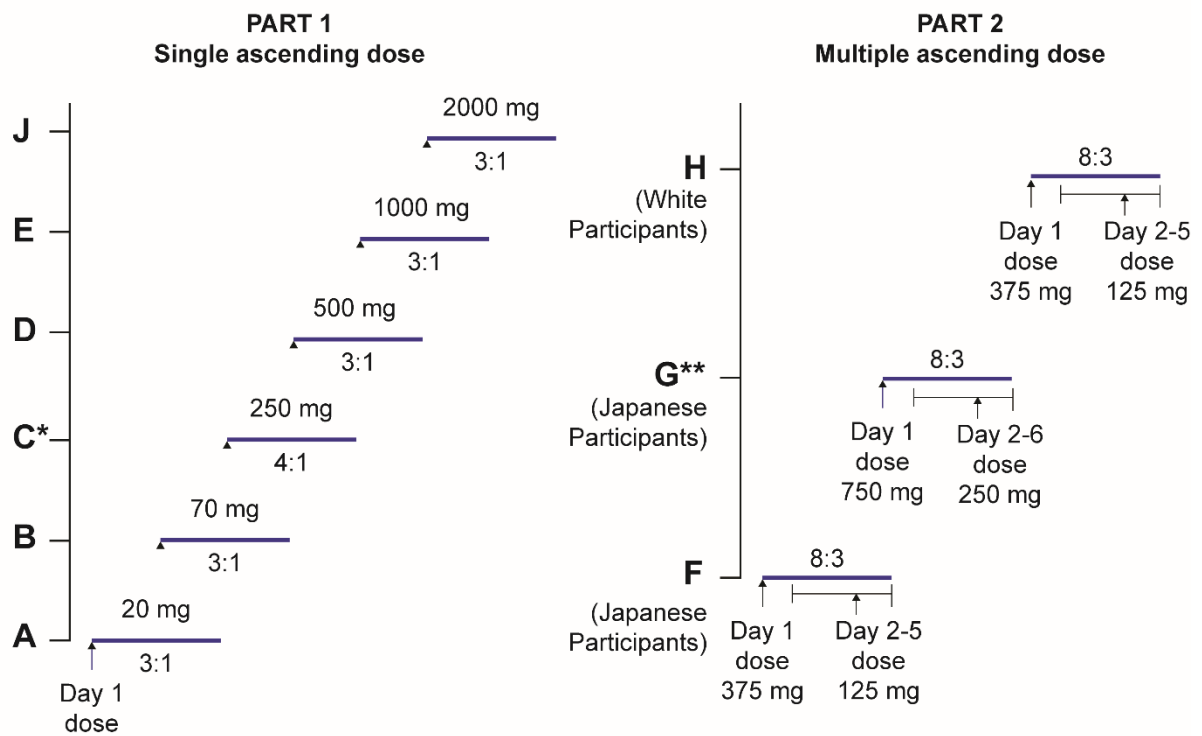

3

4 \*In Part, Cohort C also involved the evaluation of the effect of food on the pharmacokinetics of ensitrelvir. In Part 2, Cohort  
5 G also involved the evaluation of the impact of ensitrelvir on the pharmacokinetics of midazolam on Day 2 and Day 6.

6 **Supplementary Figure S2: Change in HDL-C and TG levels in multiple-dose administration**

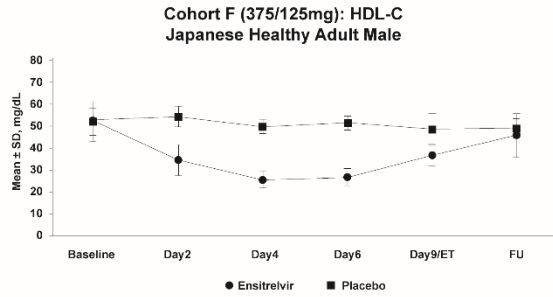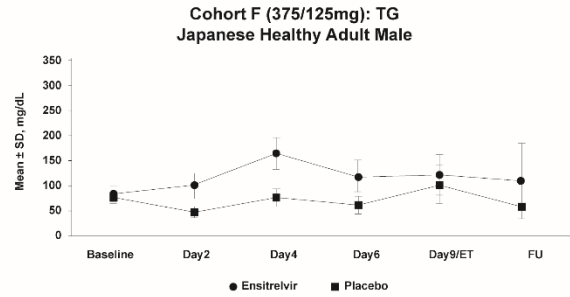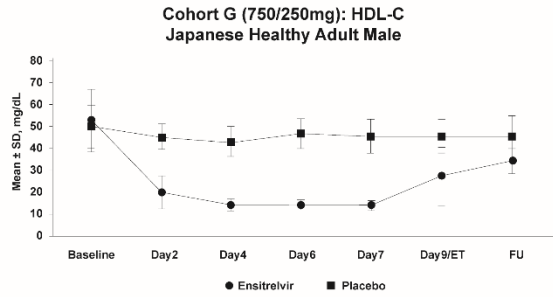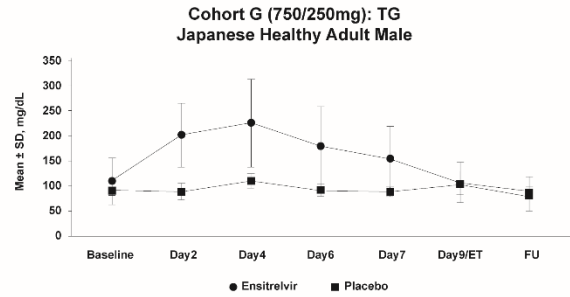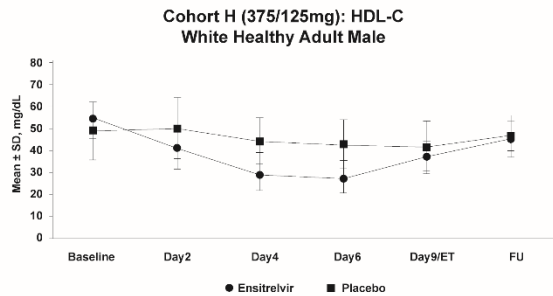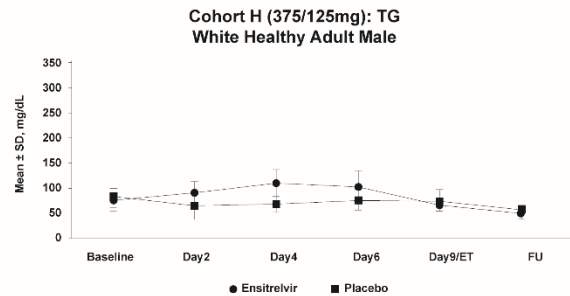

7

8 ET, early termination; FU, follow-up; HDL-C, High density lipoprotein – cholesterol; TG, triglycerides; 375/125 mg: once  
 9 daily multiple dose with 375 mg as the loading dose on Day 1 and 125 mg as the maintenance dose on Days 2 to 5; 725/250  
 10 mg: once daily multiple doses with 750 mg as the loading dose on Day 1 and 250 mg as the maintenance dose on Days 2 to 5  
 11 (or 6).

12 **Supplementary Table 1: Baseline demographics in the single dose administration part (Cohorts**  
 13 **A, B, C, D, E, and J)**

|             |             | Ensitrelvir      |                  |                  |                  |                  |                  |                  | Placebo          |
|-------------|-------------|------------------|------------------|------------------|------------------|------------------|------------------|------------------|------------------|
|             |             | Cohort A         | Cohort B         | Cohort C1        | Cohort C2        | Cohort D         | Cohort E         | Cohort J         |                  |
|             |             | 20 mg            | 70 mg            | 250 mg           | 250 mg           | 500 mg           | 1000 mg          | 2000 mg          |                  |
|             |             | N = 6            | N = 6            | N = 4            | N = 4            | N = 6            | N = 6            | N = 6            | N = 12           |
| Sex         | Male N (%)  | 6<br>(100.0)     | 6<br>(100.0)     | 4<br>(100.0)     | 4<br>(100.0)     | 6<br>(100.0)     | 6<br>(100.0)     | 6<br>(100.0)     | 12<br>(100.0)    |
|             | Age (Years) |                  |                  |                  |                  |                  |                  |                  |                  |
|             | N           | 6                | 6                | 4                | 4                | 6                | 6                | 6                | 12               |
|             | Mean (SD)   | 28.3<br>(5.7)    | 24.0<br>(4.2)    | 27.3<br>(4.1)    | 27.5<br>(4.1)    | 22.3<br>(2.7)    | 32.8<br>(9.9)    | 29.8<br>(5.5)    | 29.3<br>(5.4)    |
|             | Min         | 20               | 20               | 22               | 23               | 20               | 24               | 23               | 20               |
|             | Median      | 28.0             | 22.5             | 28.0             | 27.0             | 21.5             | 30.5             | 31.0             | 29.0             |
|             | Max         | 36               | 31               | 31               | 33               | 26               | 52               | 37               | 37               |
| Height (cm) | N           | 6                | 6                | 4                | 4                | 6                | 6                | 6                | 12               |
|             | Mean (SD)   | 168.98<br>(4.12) | 172.33<br>(4.07) | 174.78<br>(1.83) | 172.80<br>(5.86) | 171.98<br>(6.65) | 171.00<br>(6.16) | 173.82<br>(6.03) | 170.23<br>(3.42) |
|             | Min         | 163.7            | 168.3            | 173.3            | 164.3            | 165.4            | 164.2            | 163.6            | 165.0            |
|             | Median      | 169.95           | 170.95           | 174.20           | 175.10           | 169.10           | 170.20           | 174.10           | 169.95           |
|             | Max         | 173.0            | 178.7            | 177.4            | 176.7            | 182.5            | 180.5            | 181.6            | 177.1            |

|                            |             | Ensitrelvir     |                 |                 |                 |                 |                  | Placebo         |                 |
|----------------------------|-------------|-----------------|-----------------|-----------------|-----------------|-----------------|------------------|-----------------|-----------------|
|                            |             | Cohort A        | Cohort B        | Cohort C1       | Cohort C2       | Cohort D        | Cohort E         | Cohort J        |                 |
|                            |             | 20 mg           | 70 mg           | 250 mg          | 250 mg          | 500 mg          | 1000 mg          | 2000 mg         | N = 12          |
|                            |             | N = 6           | N = 6           | N = 4           | N = 4           | N = 6           | N = 6            | N = 6           |                 |
| Weight (kg)                | N           | 6               | 6               | 4               | 4               | 6               | 6                | 6               | 12              |
|                            | Mean (SD)   | 61.20<br>(5.16) | 64.10<br>(6.11) | 66.20<br>(5.85) | 67.03<br>(2.52) | 62.28<br>(7.39) | 66.50<br>(11.15) | 63.80<br>(4.56) | 61.84<br>(5.05) |
|                            | Min         | 53.5            | 55.6            | 58.8            | 64.5            | 52.5            | 54.4             | 55.8            | 51.9            |
|                            | Median      | 62.75           | 63.85           | 66.70           | 66.60           | 61.65           | 67.35            | 65.65           | 62.55           |
|                            | Max         | 67.1            | 73.7            | 72.6            | 70.4            | 71.7            | 83.8             | 68.0            | 69.6            |
| BMI (kg/m <sup>2</sup> )   | N           | 6               | 6               | 4               | 4               | 6               | 6                | 6               | 12              |
|                            | Mean (SD)   | 21.33<br>(1.65) | 21.33<br>(1.86) | 21.30<br>(1.78) | 22.38<br>(0.76) | 20.75<br>(2.01) | 22.55<br>(2.75)  | 20.83<br>(1.04) | 21.22<br>(1.58) |
|                            | Min         | 19.2            | 19.0            | 18.8            | 21.7            | 18.9            | 19.5             | 19.3            | 18.8            |
|                            | Median      | 21.40           | 21.00           | 21.80           | 22.20           | 20.10           | 22.10            | 21.00           | 21.55           |
|                            | Max         | 23.8            | 23.9            | 22.8            | 23.4            | 23.9            | 26.1             | 22.0            | 24.0            |
| Race                       | Asian N (%) | 6 (100.0)       | 6 (100.0)       | 4 (100.0)       | 4 (100.0)       | 6 (100.0)       | 6 (100.0)        | 6 (100.0)       | 12<br>(100.0)   |
| Substance usage (alcohol)  | Yes         | 3<br>(50.0)     | 3<br>(50.0)     | 1<br>(25.0)     | 0               | 4<br>(66.7)     | 0                | 2<br>(33.3)     | 3<br>(25.0)     |
|                            | No          | 3<br>(50.0)     | 3<br>(50.0)     | 3<br>(75.0)     | 4<br>(100.0)    | 2<br>(33.3)     | 6<br>(100.0)     | 4<br>(66.7)     | 9<br>(75.0)     |
| Substance usage (tobacco)  | Yes         | 0               | 0               | 0               | 0               | 0               | 0                | 0               | 0               |
|                            | No          | 6 (100.0)       | 6 (100.0)       | 4 (100.0)       | 4 (100.0)       | 6 (100.0)       | 6 (100.0)        | 6 (100.0)       | 12<br>(100.0)   |
| Substance usage (caffeine) | Yes         | 4 (66.7)        | 4 (66.7)        | 3 (75.0)        | 0               | 3 (50.0)        | 0                | 4 (66.7)        | 8 (66.7)        |
|                            | No          | 2 (33.3)        | 2 (33.3)        | 1 (25.0)        | 4 (100.0)       | 3 (50.0)        | 6 (100.0)        | 2 (33.3)        | 4 (33.3)        |
| SARS-CoV-2 test            | Negative    | 6 (100.0)       | 6 (100.0)       | 4 (100.0)       | 4 (100.0)       | 6 (100.0)       | 6 (100.0)        | 6 (100.0)       | 12<br>(100.0)   |

14 "Placebo" includes all participants given placebo in all cohorts in Part 1. The last values taken before first administration were

15 used if there were multiple results. Participants of Cohort C1 received administration in the fasted state on Period 1 and after

16 a meal on Period 2. Participants of Cohort C2 received administration after a meal on Period 1 and in the fasted state on Period

17 2.

18 BMI, Body Mass Index; Max, Maximum; Min, Minimum; N, Number of participants; SARS-CoV-2, Severe Acute Respiratory

19 Syndrome Coronavirus 2; SD, Standard Deviation.

## 20 **Supplementary Table 2: Baseline demographics in the multiple-dose administration**

### 21 **part (Cohorts F, G, and H)**

|                                               |            | Ensitrelvir |                           |            | Placebo    |                        |            |
|-----------------------------------------------|------------|-------------|---------------------------|------------|------------|------------------------|------------|
|                                               |            | Cohort F    | Cohort G                  | Cohort H   | Cohort F   | Cohort G               | Cohort H   |
|                                               |            | 375/125 mg  | 750/250 mg +<br>Midazolam | 375/125 mg |            | Placebo +<br>Midazolam |            |
|                                               |            | N = 8       | N = 8                     | N = 8      | N = 3      | N = 3                  | N = 3      |
| Sex                                           | Male N (%) | 8 (100.0)   | 8 (100.0)                 | 8 (100.0)  | 3 (100.0)  | 3 (100.0)              | 3 (100.0)  |
| Age (Years)<br>(informed consent<br>obtained) | N          | 8           | 8                         | 8          | 3          | 3                      | 3          |
|                                               | Mean (SD)  | 33.4 (5.2)  | 29.4 (7.3)                | 36.0 (6.9) | 32.3 (1.5) | 30.0 (7.9)             | 34.0 (6.9) |
|                                               | Min        | 25          | 20                        | 26         | 31         | 21                     | 26         |

|                                 |                | Ensitrelvir            |                                       |                        | Placebo       |                                    |               |
|---------------------------------|----------------|------------------------|---------------------------------------|------------------------|---------------|------------------------------------|---------------|
|                                 |                | Cohort F<br>375/125 mg | Cohort G<br>750/250 mg +<br>Midazolam | Cohort H<br>375/125 mg | Cohort F      | Cohort G<br>Placebo +<br>Midazolam | Cohort H      |
|                                 |                | N = 8                  | N = 8                                 | N = 8                  | N = 3         | N = 3                              | N = 3         |
| Height (cm)                     | Median         | 34.0                   | 29.0                                  | 34.5                   | 32.0          | 33.0                               | 38.0          |
|                                 | Max            | 39                     | 40                                    | 45                     | 34            | 36                                 | 38            |
|                                 | N              | 8                      | 8                                     | 8                      | 3             | 3                                  | 3             |
|                                 | Mean (SD)      | 171.65 (5.12)          | 171.00 (8.72)                         | 181.01 (9.58)          | 176.13 (1.52) | 172.53 (4.39)                      | 181.63 (7.28) |
|                                 | Min            | 165.6                  | 161.9                                 | 167.9                  | 174.5         | 169.9                              | 174.0         |
| Weight (kg)                     | Median         | 171.70                 | 168.50                                | 179.15                 | 176.40        | 170.10                             | 182.40        |
|                                 | Max            | 181.9                  | 186.0                                 | 197.6                  | 177.5         | 177.6                              | 188.5         |
|                                 | N              | 8                      | 8                                     | 8                      | 3             | 3                                  | 3             |
|                                 | Mean (SD)      | 66.58 (7.08)           | 68.03 (11.91)                         | 74.68 (8.32)           | 67.03 (6.68)  | 62.57 (2.05)                       | 81.13 (3.23)  |
|                                 | Min            | 60.4                   | 55.9                                  | 62.0                   | 60.0          | 60.3                               | 78.2          |
| BMI (kg/m <sup>2</sup> )        | Median         | 63.50                  | 65.80                                 | 75.05                  | 67.80         | 63.10                              | 80.60         |
|                                 | Max            | 80.2                   | 85.0                                  | 87.2                   | 73.3          | 64.3                               | 84.6          |
|                                 | N              | 8                      | 8                                     | 8                      | 3             | 3                                  | 3             |
|                                 | Mean (SD)      | 22.36 (1.38)           | 22.99 (2.54)                          | 22.83 (2.91)           | 21.70 (1.70)  | 21.10 (1.35)                       | 24.40 (2.00)  |
|                                 | Min            | 21.0                   | 19.7                                  | 20.0                   | 20.0          | 19.8                               | 22.1          |
| Race                            | Median         | 22.00                  | 23.95                                 | 22.35                  | 21.70         | 21.00                              | 25.40         |
|                                 | Max            | 24.7                   | 25.5                                  | 27.1                   | 23.4          | 22.5                               | 25.7          |
|                                 | Asian<br>N (%) | 8 (100.0)              | 8 (100.0)                             | 0                      | 3 (100.0)     | 3 (100.0)                          | 0             |
| Substance<br>usage<br>(alcohol) | White<br>N (%) | 0                      | 0                                     | 8 (100.0)              | 0             | 0                                  | 3 (100.0)     |
|                                 | Yes            | 0                      | 0                                     | 0                      | 0             | 0                                  | 0             |
| Substance<br>usage<br>(tobacco) | No             | 8 (100.0)              | 8 (100.0)                             | 8 (100.0)              | 3 (100.0)     | 3 (100.0)                          | 3 (100.0)     |
|                                 | Yes            | 0                      | 0                                     | 0                      | 0             | 0                                  | 0             |
| SARS-CoV-<br>2 test             | No             | 8 (100.0)              | 8 (100.0)                             | 8 (100.0)              | 3 (100.0)     | 3 (100.0)                          | 3 (100.0)     |
|                                 | Negative       | 8 (100.0)              | 8 (100.0)                             | 8 (100.0)              | 3 (100.0)     | 3 (100.0)                          | 3 (100.0)     |
|                                 | Positive       | 0                      | 0                                     | 0                      | 0             | 0                                  | 0             |

22 The last values taken before first administration were used if there were multiple results. Participants in Cohort F and G were  
23 Japanese healthy adult males. Participants in Cohort H were White healthy adult males. 375/125 mg: once daily multiple dose  
24 with 375 mg as the loading dose on Day 1 and 125 mg as the maintenance dose on Days 2 to 5; 725/250 mg: once daily  
25 multiple doses with 750 mg as the loading dose on Day 1 and 250 mg as the maintenance dose on Days 2 to 6.

26 BMI, Body Mass Index; Max, Maximum; Min, Minimum; N, Number of participants; SARS-CoV-2, Severe Acute Respiratory  
27 Syndrome Coronavirus 2; SD, Standard Deviation.

28 **Supplementary Table 3: Blood lipid profiling of participants over the study period in the single**  
29 **dose administration part (Cohorts A, B, C, D, E, and J)**

| Parameter (unit)                  | Time point [Cohort C, Period 2]   | Statistic          | Ensitrelvir                |                            |                                             |                             |                              |                              | Placebo<br>N = 12  |
|-----------------------------------|-----------------------------------|--------------------|----------------------------|----------------------------|---------------------------------------------|-----------------------------|------------------------------|------------------------------|--------------------|
|                                   |                                   |                    | Cohort A<br>20 mg<br>N = 6 | Cohort B<br>70 mg<br>N = 6 | Cohort C<br>fasted state<br>250 mg<br>N = 8 | Cohort D<br>500 mg<br>N = 6 | Cohort E<br>1000 mg<br>N = 6 | Cohort J<br>2000 mg<br>N = 6 |                    |
| Cholesterol (mmol/L)              | Baseline                          | n                  | 6                          | 6                          | 8                                           | 6                           | 6                            | 6                            | 12                 |
|                                   |                                   | Mean (SD)          | 4.1635<br>(0.4177)         | 4.0987<br>(0.4716)         | 4.1053<br>(0.6235)                          | 4.2838<br>(0.5674)          | 4.1332<br>(0.5434)           | 4.4608<br>(0.8547)           | 4.6333<br>(0.6946) |
|                                   |                                   | Min                | 3.724                      | 3.439                      | 2.948                                       | 3.491                       | 3.310                        | 3.414                        | 3.362              |
|                                   |                                   | Median             | 4.0730                     | 4.0470                     | 4.1505                                      | 4.2795                      | 4.2410                       | 4.2280                       | 4.6290             |
|                                   | Day 2 [Day 16]                    | Max                | 4.810                      | 4.707                      | 4.758                                       | 5.094                       | 4.758                        | 5.508                        | 5.870              |
|                                   |                                   | n                  | 6                          | 6                          | 8                                           | 6                           | 6                            | 6                            | 12                 |
|                                   |                                   | Mean (SD)          | 4.2842<br>(0.4263)         | 4.1463<br>(0.5889)         | 3.8918<br>(0.6153)                          | 3.9005<br>(0.5669)          | 3.5257<br>(0.4598)           | 3.9952<br>(0.9013)           | 4.7388<br>(0.7924) |
|                                   |                                   | Min                | 3.905                      | 3.388                      | 2.870                                       | 3.155                       | 2.767                        | 2.870                        | 3.414              |
|                                   | Day 4 [Day 18]                    | Median             | 4.1245                     | 4.0860                     | 3.9305                                      | 3.8660                      | 3.6205                       | 3.7625                       | 4.7320             |
|                                   |                                   | Max                | 4.939                      | 5.043                      | 4.655                                       | 4.629                       | 3.957                        | 5.198                        | 6.310              |
|                                   |                                   | n                  | 6                          | 6                          | 8                                           | 6                           | 6                            | 6                            | 12                 |
|                                   |                                   | Mean (SD)          | 4.2668<br>(0.4032)         | 4.0515<br>(0.7018)         | 3.9695<br>(0.4928)                          | 3.8273<br>(0.5428)          | 3.2498<br>(0.5322)           | 3.4133<br>(0.7824)           | 4.6008<br>(0.8016) |
|                                   | Day 7 [Day 21]/ Early termination | Min                | 3.750                      | 3.129                      | 3.388                                       | 3.103                       | 2.302                        | 2.379                        | 3.155              |
|                                   |                                   | Median             | 4.3055                     | 3.9305                     | 3.9825                                      | 4.0470                      | 3.3230                       | 3.3615                       | 4.4735             |
|                                   |                                   | Max                | 4.810                      | 5.017                      | 4.577                                       | 4.293                       | 3.905                        | 4.422                        | 6.413              |
|                                   |                                   | n                  | 6                          | 6                          | 8                                           | 6                           | 6                            | 6                            | 12                 |
|                                   | Follow up                         | Mean (SD)          | 4.1290<br>(0.4327)         | 3.8145<br>(0.7363)         | 4.0019<br>(0.5499)                          | 3.8103<br>(0.5863)          | 3.7628<br>(0.5824)           | 3.9437<br>(0.7807)           | 4.4458<br>(0.8482) |
|                                   |                                   | Min                | 3.646                      | 2.974                      | 3.103                                       | 3.129                       | 2.664                        | 3.077                        | 2.948              |
|                                   |                                   | Median             | 4.1505                     | 3.5815                     | 4.0340                                      | 3.8535                      | 3.9180                       | 3.7235                       | 4.3315             |
|                                   |                                   | Max                | 4.707                      | 4.888                      | 4.810                                       | 4.681                       | 4.396                        | 5.069                        | 6.310              |
| Follow up                         | n                                 | 6                  | 6                          | 4                          | 6                                           | 6                           | 6                            | 11                           |                    |
|                                   | Mean (SD)                         | 3.9048<br>(0.2727) | 3.7368<br>(0.6184)         | 3.9760<br>(0.7375)         | 3.6505<br>(0.4573)                          | 3.7410<br>(0.5172)          | 3.7112<br>(0.6677)           | 4.2294<br>(0.7944)           |                    |
|                                   | Min                               | 3.465              | 2.922                      | 2.896                      | 2.974                                       | 2.741                       | 3.026                        | 3.129                        |                    |
|                                   | Median                            | 3.9695             | 3.7110                     | 4.2670                     | 3.6460                                      | 3.9435                      | 3.5430                       | 3.9570                       |                    |
| Follow up                         | Max                               | 4.215              | 4.707                      | 4.474                      | 4.293                                       | 4.138                       | 4.526                        | 5.741                        |                    |
|                                   | n                                 | 6                  | 6                          | 8                          | 6                                           | 6                           | 6                            | 12                           |                    |
|                                   | Mean (SD)                         | 460.0 (46.0)       | 436.7 (46.8)               | 486.3 (76.1)               | 546.7 (127.9)                               | 413.3 (80.7)                | 543.3 (82.6)                 | 567.5 (99.8)                 |                    |
|                                   | Min                               | 400                | 370                        | 370                        | 380                                         | 300                         | 420                          | 450                          |                    |
| Day 2 [Day 16]                    | Median                            | 470.0              | 445.0                      | 510.0                      | 540.0                                       | 425.0                       | 535.0                        | 530.0                        |                    |
|                                   | Max                               | 510                | 480                        | 570                        | 710                                         | 530                         | 640                          | 750                          |                    |
|                                   | n                                 | 6                  | 6                          | 8                          | 6                                           | 6                           | 6                            | 12                           |                    |
|                                   | Mean (SD)                         | 458.3 (47.9)       | 413.3 (42.7)               | 376.3 (81.9)               | 330.0 (106.6)                               | 166.7 (45.5)                | 225.0 (76.6)                 | 569.2 (99.6)                 |                    |
| Day 4 [Day 18]                    | Min                               | 390                | 360                        | 220                        | 200                                         | 100                         | 150                          | 450                          |                    |
|                                   | Median                            | 465.0              | 430.0                      | 380.0                      | 325.0                                       | 175.0                       | 200.0                        | 530.0                        |                    |
|                                   | Max                               | 520                | 450                        | 470                        | 460                                         | 220                         | 330                          | 770                          |                    |
|                                   | n                                 | 6                  | 6                          | 8                          | 6                                           | 6                           | 6                            | 12                           |                    |
| Day 7 [Day 21]/ Early termination | Mean (SD)                         | 446.7 (63.1)       | 411.7 (52.3)               | 401.3 (66.4)               | 340.0 (74.8)                                | 180.0 (52.5)                | 171.7 (55.6)                 | 538.3 (94.9)                 |                    |
|                                   | Min                               | 370                | 340                        | 300                        | 230                                         | 140                         | 120                          | 440                          |                    |
|                                   | Median                            | 450.0              | 420.0                      | 390.0                      | 340.0                                       | 165.0                       | 155.0                        | 510.0                        |                    |
|                                   | Max                               | 510                | 470                        | 480                        | 440                                         | 280                         | 280                          | 730                          |                    |
| Day 7 [Day 21]/ Early termination | n                                 | 6                  | 6                          | 8                          | 6                                           | 6                           | 6                            | 12                           |                    |
|                                   | Mean (SD)                         | 440.0 (66.9)       | 396.7 (60.2)               | 438.8 (76.6)               | 421.7 (83.8)                                | 303.3 (61.5)                | 253.3 (105.0)                | 531.7 (107.7)                |                    |

|                       |                                   |                |                 |                 |                 |                 |                 |                 |                 |
|-----------------------|-----------------------------------|----------------|-----------------|-----------------|-----------------|-----------------|-----------------|-----------------|-----------------|
|                       | Min                               | 370            | 320             | 330             | 280             | 210             | 40              | 410             |                 |
|                       | Median                            | 445.0          | 400.0           | 445.0           | 440.0           | 305.0           | 295.0           | 505.0           |                 |
|                       | Max                               | 510            | 480             | 530             | 500             | 400             | 310             | 750             |                 |
| LDL-C (mg/L)          | Follow up                         | n              | 6               | 6               | 4               | 6               | 6               | 11              |                 |
|                       |                                   | Mean (SD)      | 445.0 (70.1)    | 420.0 (55.1)    | 445.0 (113.9)   | 450.0 (85.1)    | 343.3 (47.2)    | 405.0 (45.9)    | 533.6 (113.2)   |
|                       |                                   | Min            | 370             | 350             | 340             | 320             | 260             | 360             | 410             |
|                       |                                   | Median         | 440.0           | 435.0           | 425.0           | 470.0           | 350.0           | 395.0           | 500.0           |
|                       |                                   | Max            | 530             | 490             | 590             | 540             | 400             | 490             | 760             |
|                       | Baseline                          | n              | 6               | 8               | 8               | 6               | 6               | 6               | 12              |
|                       |                                   | Mean (SD)      | 993.3 (142.4)   | 995.0 (194.6)   | 900.0 (199.3)   | 990.0 (228.7)   | 986.7 (175.3)   | 1051.7 (296.1)  | 1052.5 (263.9)  |
|                       |                                   | Min            | 850             | 770             | 540             | 710             | 690             | 750             | 630             |
|                       |                                   | Median         | 970.0           | 920.0           | 865.0           | 945.0           | 1015.0          | 995.0           | 1020.0          |
|                       |                                   | Max            | 1230            | 1310            | 1150            | 1360            | 1170            | 1410            | 1620            |
|                       |                                   | Day 2 [Day 16] | n               | 6               | 6               | 8               | 6               | 6               | 12              |
|                       |                                   | Mean (SD)      | 1048.3 (164.1)  | 1041.7 (241.5)  | 916.3 (179.2)   | 951.7 (219.6)   | 840.0 (141.8)   | 901.7 (268.8)   | 1112.5 (317.2)  |
|                       | Min                               | 900            | 790             | 580             | 700             | 580             | 630             | 610             |                 |
|                       | Median                            | 1015.0         | 965.0           | 885.0           | 925.0           | 880.0           | 815.0           | 1075.0          |                 |
|                       | Max                               | 1310           | 1470            | 1150            | 1250            | 970             | 1250            | 1910            |                 |
|                       | Day 4 [Day 18]                    | n              | 6               | 6               | 8               | 6               | 6               | 12              |                 |
|                       | Mean (SD)                         | 1026.7 (152.3) | 946.7 (254.0)   | 942.5 (140.8)   | 950.0 (219.1)   | 800.0 (159.1)   | 865.0 (239.7)   | 1047.5 (320.9)  |                 |
|                       | Min                               | 840            | 670             | 740             | 620             | 540             | 550             | 550             |                 |
|                       | Median                            | 1050.0         | 880.0           | 930.0           | 985.0           | 875.0           | 870.0           | 1000.0          |                 |
|                       | Max                               | 1190           | 1360            | 1160            | 1200            | 940             | 1200            | 1900            |                 |
|                       | Day 7 [Day 21]/ Early termination | n              | 6               | 6               | 8               | 6               | 6               | 12              |                 |
|                       | Mean (SD)                         | 966.7 (150.6)  | 881.7 (293.5)   | 923.8 (136.4)   | 928.3 (263.5)   | 1003.3 (198.3)  | 1135.0 (327.0)  | 1015.8 (346.6)  |                 |
|                       | Min                               | 770            | 620             | 710             | 610             | 620             | 820             | 500             |                 |
|                       | Median                            | 1015.0         | 790.0           | 900.0           | 900.0           | 1080.0          | 1020.0          | 955.0           |                 |
|                       | Max                               | 1110           | 1370            | 1130            | 1350            | 1160            | 1610            | 1900            |                 |
| Triglyceride (mmol/L) | Follow up                         | n              | 6               | 6               | 4               | 6               | 6               | 11              |                 |
|                       |                                   | Mean (SD)      | 923.3 (104.6)   | 873.3 (242.9)   | 977.5 (213.0)   | 843.3 (216.1)   | 988.3 (155.1)   | 951.7 (249.0)   | 956.4 (299.2)   |
|                       |                                   | Min            | 790             | 630             | 680             | 630             | 680             | 700             | 580             |
|                       |                                   | Median         | 915.0           | 805.0           | 1030.0          | 795.0           | 1035.0          | 865.0           | 920.0           |
|                       |                                   | Max            | 1080            | 1320            | 1170            | 1170            | 1100            | 1260            | 1490            |
|                       | Baseline                          | n              | 6               | 6               | 8               | 6               | 6               | 6               | 12              |
|                       |                                   | Mean (SD)      | 0.8825 (0.2807) | 1.0330 (0.3537) | 0.9596 (0.4428) | 0.7507 (0.1445) | 1.0275 (0.3223) | 0.9975 (0.4064) | 0.8702 (0.3224) |
|                       |                                   | Min            | 0.644           | 0.485           | 0.474           | 0.632           | 0.565           | 0.542           | 0.440           |
|                       |                                   | Median         | 0.7730          | 1.0615          | 0.8245          | 0.7055          | 1.0840          | 1.0220          | 0.7730          |
|                       |                                   | Max            | 1.321           | 1.479           | 1.863           | 1.016           | 1.332           | 1.479           | 1.671           |
|                       |                                   | Day 2 [Day 16] | n               | 6               | 6               | 8               | 6               | 6               | 12              |
|                       |                                   | Mean (SD)      | 1.0032 (0.2053) | 1.1478 (0.2935) | 1.3053 (0.6212) | 1.2928 (0.2879) | 2.3427 (0.6155) | 2.0737 (0.5253) | 0.9314 (0.2873) |
|                       | Min                               | 0.700          | 0.711           | 0.598           | 1.039           | 1.456           | 1.524           | 0.463           |                 |
|                       | Median                            | 1.0165         | 1.0895          | 1.1345          | 1.1740          | 2.2295          | 1.9475          | 0.8525          |                 |
|                       | Max                               | 1.310          | 1.547           | 2.506           | 1.818           | 3.105           | 2.789           | 1.603           |                 |
|                       | Day 4 [Day 18]                    | n              | 6               | 6               | 8               | 6               | 6               | 12              |                 |

|                                   |           |                    |                    |                    |                    |                    |                    |                    |
|-----------------------------------|-----------|--------------------|--------------------|--------------------|--------------------|--------------------|--------------------|--------------------|
|                                   | Mean (SD) | 1.3643<br>(0.2213) | 1.4170<br>(0.5431) | 1.2235<br>(0.3569) | 1.1327<br>(0.1334) | 1.9683<br>(0.5250) | 1.7668<br>(0.4684) | 1.2945<br>(0.4778) |
|                                   | Min       | 1.084              | 0.948              | 0.892              | 0.937              | 1.321              | 1.073              | 0.745              |
|                                   | Median    | 1.2985             | 1.3270             | 1.0670             | 1.1400             | 1.8855             | 1.8120             | 1.1400             |
|                                   | Max       | 1.671              | 2.427              | 1.795              | 1.276              | 2.755              | 2.303              | 2.427              |
| Day 7 [Day 21]/ Early termination | n         | 6                  | 6                  | 8                  | 6                  | 6                  | 6                  | 12                 |
|                                   | Mean (SD) | 1.3852<br>(0.2059) | 1.4393<br>(0.6236) | 1.0571<br>(0.4382) | 0.9937<br>(0.1403) | 1.2210<br>(0.5146) | 0.7867<br>(0.1677) | 1.1950<br>(0.3927) |
|                                   | Min       | 1.039              | 0.858              | 0.790              | 0.779              | 0.632              | 0.508              | 0.655              |
|                                   | Median    | 1.4285             | 1.2810             | 0.8470             | 0.9770             | 1.1570             | 0.8130             | 1.1745             |
|                                   | Max       | 1.581              | 2.608              | 2.010              | 1.174              | 1.818              | 0.971              | 1.897              |
| Follow up                         | n         | 6                  | 6                  | 4                  | 6                  | 6                  | 6                  | 11                 |
|                                   | Mean (SD) | 0.7037<br>(0.1371) | 0.8882<br>(0.4558) | 0.6295<br>(0.1096) | 0.5627<br>(0.0611) | 0.7565<br>(0.3775) | 0.4255<br>(0.1538) | 0.8015<br>(0.7116) |
|                                   | Min       | 0.587              | 0.305              | 0.542              | 0.463              | 0.463              | 0.294              | 0.327              |
|                                   | Median    | 0.6605             | 0.7620             | 0.5985             | 0.5700             | 0.5480             | 0.3615             | 0.5870             |
|                                   | Max       | 0.948              | 1.626              | 0.779              | 0.632              | 1.264              | 0.689              | 2.845              |

30 "Placebo" includes all participants given placebo in all cohorts in Part 1. The last values taken before first administration were  
31 used if there were multiple results. Four participants of Cohort C received administration in the fasted state on Period 1 and  
32 after a meal on Period 2. The other four participants of Cohort C received administration after meal on Period 1 and in the  
33 fasted state on Period 2 (Day 16, 18 and 21).  
34 HDL-C, high density lipoprotein-Cholesterol; LDL-C, low density lipoprotein-Cholesterol; Max, Maximum; Min, Minimum;  
35 N, Number of participants; SD, Standard Deviation.

#### 36 **Supplementary Table 4: Study design**

##### 37 **(A) Single-dose administration**

| Cohort         | Treatment           | Sample size | Total Sample size | Food condition                                      | Participants                |
|----------------|---------------------|-------------|-------------------|-----------------------------------------------------|-----------------------------|
| A              | Ensitrelvir 20 mg   | 1           | 8                 | Fasted                                              | Japanese healthy adult male |
|                | Placebo             | 1           |                   |                                                     |                             |
|                | Ensitrelvir 20 mg   | 5           |                   |                                                     |                             |
|                | Placebo             | 1           |                   |                                                     |                             |
| B              | Ensitrelvir 70 mg   | 6           | 8                 | Fasted                                              | Japanese healthy adult male |
|                | Placebo             | 2           |                   |                                                     |                             |
| C <sup>a</sup> | Ensitrelvir 250 mg  | 4           | 5                 | Fasted in Period 1 and Fed <sup>b</sup> in Period 2 | Japanese healthy adult male |
|                | Placebo             | 1           |                   |                                                     |                             |
| C <sup>a</sup> | Ensitrelvir 250 mg  | 4           | 5                 | Fed <sup>b</sup> in Period 1 and Fasted in Period 2 | Japanese healthy adult male |
|                | Placebo             | 1           |                   |                                                     |                             |
| D              | Ensitrelvir 500 mg  | 6           | 8                 | Fasted                                              | Japanese healthy adult male |
|                | Placebo             | 2           |                   |                                                     |                             |
| E              | Ensitrelvir 1000 mg | 6           | 8                 | Fasted                                              | Japanese healthy adult male |

|   |    |                     |   |   |
|---|----|---------------------|---|---|
|   |    | Placebo             | 2 |   |
|   | J1 | Ensitrelvir 2000 mg | 1 |   |
| J |    | Placebo             | 1 | 8 |
|   | J2 | Ensitrelvir 2000 mg | 5 |   |
|   |    | Placebo             | 1 |   |

38 <sup>a</sup>The effect of food was assessed in Cohort C; <sup>b</sup>High-fat/high-calorie meal, after breakfast.

39 **(B) Multiple-dose administration**

| Cohort         | Treatment            |                               | Group       | Sample size | Total sample size | Participants                |
|----------------|----------------------|-------------------------------|-------------|-------------|-------------------|-----------------------------|
|                | Loading dose (Day 1) | Maintenance dose (Days 2-5/6) |             |             |                   |                             |
| F              | 375 mg               | 125 mg                        | Ensitrelvir | 8           | 11                | Japanese healthy adult male |
|                |                      |                               | Placebo     | 3           |                   |                             |
| G <sup>a</sup> | 750 mg               | 250 mg                        | Ensitrelvir | 8           | 11                |                             |
|                |                      |                               | Placebo     | 3           |                   |                             |
| H              | 375 mg               | 125 mg                        | Ensitrelvir | 8           | 11                | White healthy adult male    |
|                |                      |                               | Placebo     | 3           |                   |                             |

40 <sup>a</sup>The effect of multiple-dose administration of ensitrelvir on the pharmacokinetics of midazolam (single dose 2mg [1 mL

41 syrup]) was investigated.
